# Supplementary material for: Abnormal Dorsal Caudate Activation Mediated Impaired Cognitive Flexibility in Mild Traumatic Brain Injury
Source: MDPI journal article supplement (doi:10.3390/jcm11092484), 2022-04-28
Supplement: s1 [file s1]

# Supplementary Materials

## fMRI Behavioral Performance

Our data demonstrated that the patients with mTBI had significantly more ER ( $t_{31} = 3.098$ ,  $P < 0.005$ ) and longer RT ( $t_{31} = 1.638$ ,  $P > 0.05$ ) compared to HCs during the whole task.

In RT analyses, a  $3 \times 2$  ANOVA with task condition (OG, DI, TS conditions) and group (mTBI patients, HCs) as independent variables revealed a significant main effect of task condition [ $F_{(2,62)} = 174.655$ ,  $P < 0.001$ ], with no task condition  $\times$  group interaction [ $F_{(2,62)} = 0.221$ ,  $P = 0.802$ ] or main effect of group condition [ $F_{(1,31)} = 3.847$ ,  $P = 0.059$ ] (Figure 2A). Post hoc analyses revealed significantly higher RTs in the TS condition compared to the OG condition ( $P < 0.001$ ) and the DI condition ( $P < 0.001$ ) in both groups. In addition, there was significantly longer RTs for the DI condition compared with the OG condition ( $P < 0.001$ ) in both groups. Furthermore, compared with HCs, patients with mTBI exhibited significantly longer RT in the TS condition [ $F_{(1,31)} = 4.247$ ,  $P = 0.048$ ], reflecting impaired cognitive flexibility on behavior level.

The ER showed that there were both a significant main effect of task condition [ $F_{(2,62)} = 7.875$ ,  $P < 0.001$ ] and main effect of group condition [ $F_{(1,31)} = 9.953$ ,  $P = 0.004$ ], without task condition  $\times$  group interaction [ $F_{(2,62)} = 2.639$ ,  $P = 0.079$ ] (Figure 2B). Post hoc analyses demonstrated that ER was significantly higher for the TS condition as compared to the OG condition or the DI condition in mTBI patients ( $P < 0.05$ ). There were no significant differences between all conditions in HCs [ $F_{(2,62)} = 0.494$ ,  $P = 0.615$ ]. Furthermore, the mTBI patients were significantly less accurate than HCs across all conditions ( $P < 0.05$ ).

**Table S1** Results from the BOLD-fMRI analysis of the contrast mTBI < HC in OG condition (FEW corrected)

| Brain regions | Hemisphere | BA   | Peak MNI coordinates |     |     | Z-value | Size(voxels) |
|---------------|------------|------|----------------------|-----|-----|---------|--------------|
|               |            |      | x                    | y   | z   |         |              |
| mSFG          | R          | 8, 9 | 10                   | 20  | 50  | 2.804   | 152          |
| mOG           | R          | 14   | 4                    | 30  | -12 | 2.745   | 32           |
| dISFG         | R          | 6, 8 | 20                   | 26  | 42  | 2.936   | 309          |
| vIMFG         | R          | 6    | 28                   | 0   | 50  | 2.703   | 180          |
| rdSG          | R          | 40   | 64                   | -30 | 46  | 3.375   | 126          |

mTBI, mild traumatic brain injury; HCs, healthy controls; FWE, family wise error; OG, ongoing; MNI, Montreal Neurological Institute; R, right; mSFG, medial Superior Frontal Gyrus; mOG, medial Orbital Gyrus; dISFG, dorsolateral Superior Frontal Gyrus; vIMFG, ventrolateral Middle Frontal Gyrus; rdSG, rostradorsal Supramarginal Gyrus.

**Table S2** Results from the BOLD-fMRI analysis of the contrast mTBI < HC in DI condition (FWE corrected)

| Brain regions | Hemisphere | BA       | Peak MNI coordinates |     |    | Z-value | Size(voxels) |
|---------------|------------|----------|----------------------|-----|----|---------|--------------|
|               |            |          | x                    | y   | z  |         |              |
| PCC           | L          | 23       | -12                  | -16 | 42 | 3.016   | 253          |
| dlSFG         | L          | 8        | -16                  | 22  | 40 | 2.359   | 217          |
|               | R          | 6, 8     | 20                   | 30  | 40 | 3.214   | 368          |
| mSFG          | L          | 10       | -10                  | 60  | 6  | 3.219   | 353          |
|               | R          | 6, 9, 91 | 6                    | 48  | 40 | 3.313   | 280          |
| vlMFG         | R          | 6        | 26                   | -2  | 46 | 2.957   | 171          |
| pIns          | R          | NA       | 34                   | -10 | 14 | 3.442   | 109          |

mTBI, mild traumatic brain injury; HCs, healthy controls; FWE, family wise error; DI, distractor inhibition; MNI, Montreal Neurological Institute; L, left; R, right; PCC, posterior cingulate cortex; dlSFG, dorsolateral Superior Frontal Gyrus; mSFG, medial Superior Frontal Gyrus; vlMFG, ventrolateral Middle Frontal Gyrus; pIns, posterior insula.
